# Supplementary material for: A guanidyl-functionalized TiO2 nanoparticle-anchored graphene nanohybrid for enhanced capture of phosphopeptides
Source: RSC Adv. 2018 Aug 20;8(51):29476–81. doi: 10.1039/c8ra05006f (PMC9084561; doi:10.1039/c8ra05006f)
Supplement: RA-008-C8RA05006F-s001 [file RA-008-C8RA05006F-s001.pdf]

## Supporting Information

### A guanidyl-functionalized TiO<sub>2</sub> nanoparticle-anchored graphene nanohybrid for enhanced capture of phosphopeptides

Hailong Liu<sup>1,2</sup>, Bin Lian<sup>1\*</sup>

<sup>1</sup> College of Life Sciences, Nanjing Normal University, Nanjing, 210023, China

<sup>2</sup> State Key Laboratory of Environmental Geochemistry, Institute of Geochemistry, Chinese Academy of Sciences, Guiyang, China

## **Experimental details**

### **Materials and chemicals**

Trifluoroacetic acid (TFA),  $\beta$ -casein, bovine serum albumin(BSA), ammonium bicarbonate( $\text{NH}_4\text{HCO}_3$ ), O-methylisourea hemisulfate and 2,5-dihydroxybenzoic acid (2,5-DHB) were purchased from Sigma-Aldrich (St. Louis, MO, USA). Sequencing grade modified trypsin was obtained from Promega (Madison, USA). Acetonitrile (ACN) was obtained from Merck (Darmstadt, Germany). Graphite powder (99.9995%, 325 mesh) was from Alfa Aesar. Human serum was supplied by Jiangsu Province Hospital of TCM. Nonfat milk was purchased from a local supermarket. All aqueous solutions were prepared using Milli-Q water by Milli-Q purification system (Millipore, Milford, MA, USA).

### **Sample preparation**

$\beta$ -casein and bovine serum albumin (BSA) were dissolved in 25 mM ammonium bicarbonate buffer solution (pH=8.1) containing trypsin at the ratio of enzyme-to-protein of 1:40 (w/w) at 37 °C for 16 h. Human serum was diluted to five times with 50% acetonitrile and 0.1% TFA aqueous solution (v/v). 50  $\mu\text{L}$  Nonfat milk was diluted to 250  $\mu\text{L}$  in 50 mM ammonium bicarbonate buffer solution. After centrifugation at 14000 rpm for 25 min, the supernatant was denatured at 100 °C for 5 min, 10  $\mu\text{g}$  trypsin was added and then the mixture was incubated for 12 h at 37 °C.

### **Characterization and measurements**

The Infrared spectra were obtained from a Nicolet NEXUS 670 Fourier transform infrared spectrometer. The Scanning electron microscopy (SEM) images were determined by a JSM-5610LV scanning electron microscope system. Transmission electron microscopy (TEM) images were made on a JEOL JEM-2100F transmission electron microscopy operated at an accelerating

voltage of 200 kV. The chemical composition of the GF-TiO<sub>2</sub>-GO nanohybrids was obtained by a Bruker QX200 Energy-dispersive X-ray(EDX) spectrometer.

#### **MALDI-TOF MS analysis**

For MALDI-TOF MS, 1 μL of the eluate was deposited on a MALDI plate and dried in the air, and then 1 μL of 2,5-DHB (20 mg/mL, dissolved in 50% ACN (v/v) containing 1% H<sub>3</sub>PO<sub>4</sub>) was deposited and dried. All the MALDI TOF MS spectra were recorded with MALDI TOF/TOF MS ( BRUKER Daltonics, Germany) in reflected positive-ion mode with 200 laser shots in each spectrum.

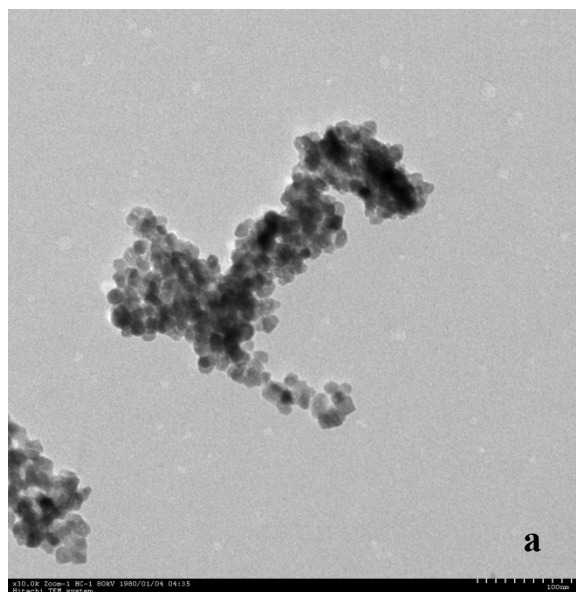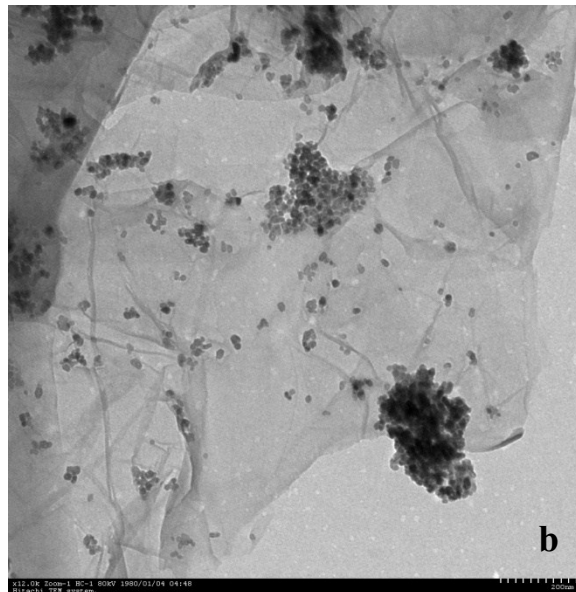

**Fig. S1.** TEM images of (a)  $\text{TiO}_2$ ; (b) GF- $\text{TiO}_2$ -GO

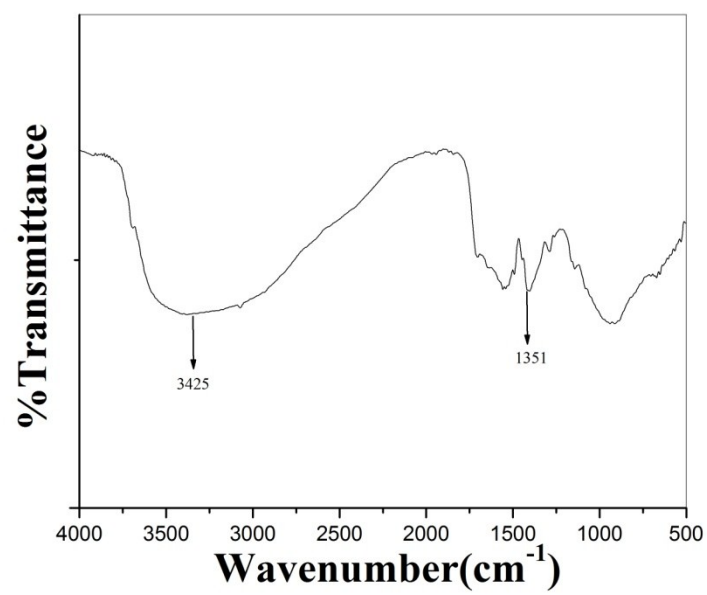

**Fig. S2.** FTIR spectra of TiO<sub>2</sub>.

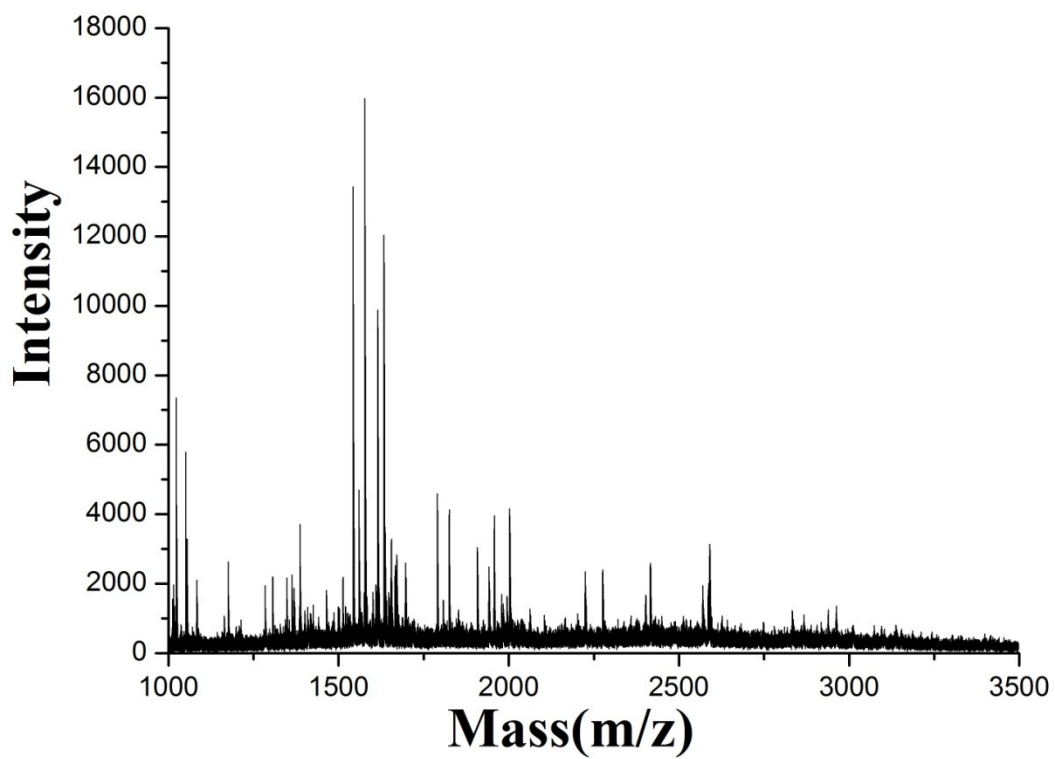

**Fig. S3.** MALDI-TOF mass spectra of tryptic digests of  $5 \times 10^{-10}$ M  $\beta$ -casein after enriched by  $\text{TiO}_2$ .

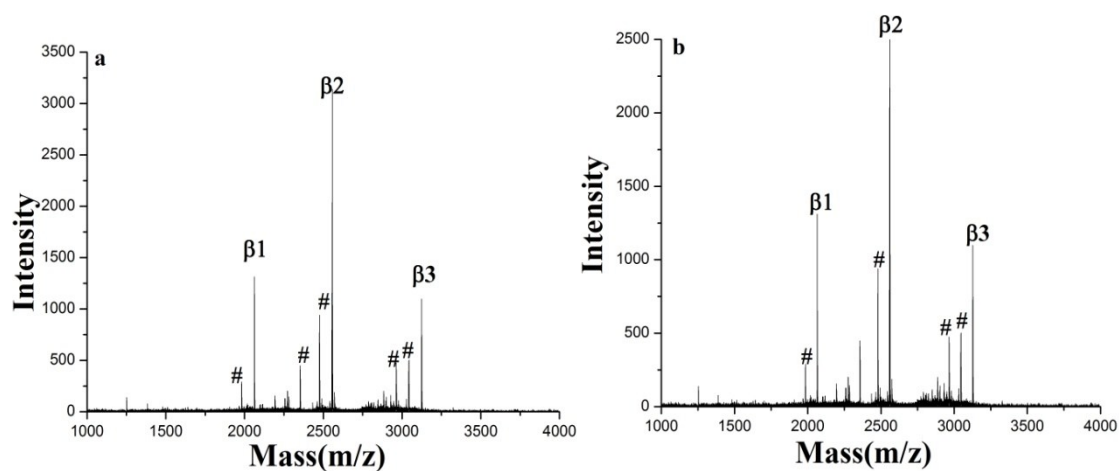

**Fig. S4.** MALDI-TOF mass spectra of tryptic digests from a peptide mixture of  $\beta$ -casein after enriched by GF-TiO<sub>2</sub>-GO after 1 day(a) and 20 days (b). (# dephosphorylated fragment)

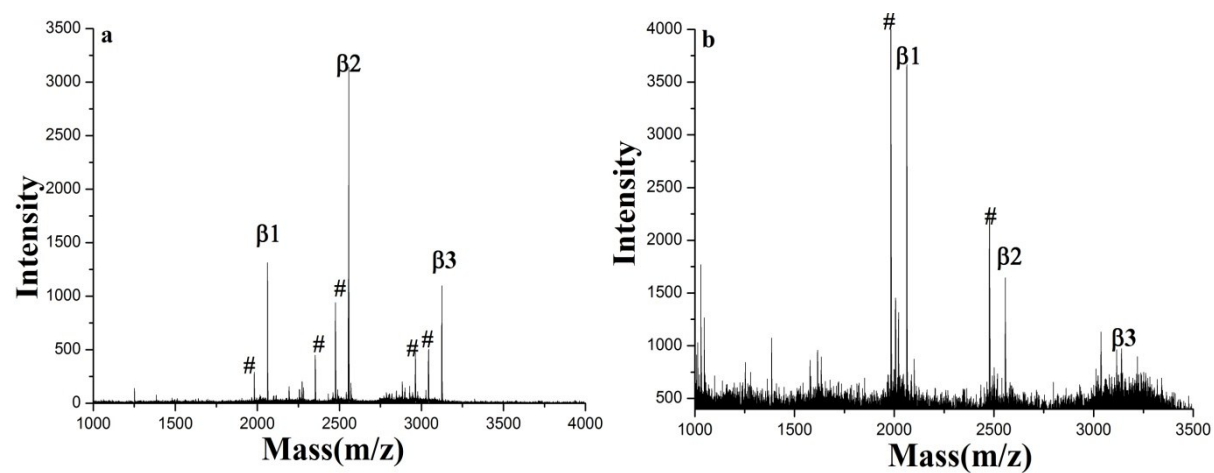

**Fig. S5.** MALDI-TOF mass spectra of tryptic digests from a peptide mixture of  $\beta$ -casein after enriched by GF-TiO<sub>2</sub>-GO for the first time(a) and the third time (b). (# dephosphorylated fragment)

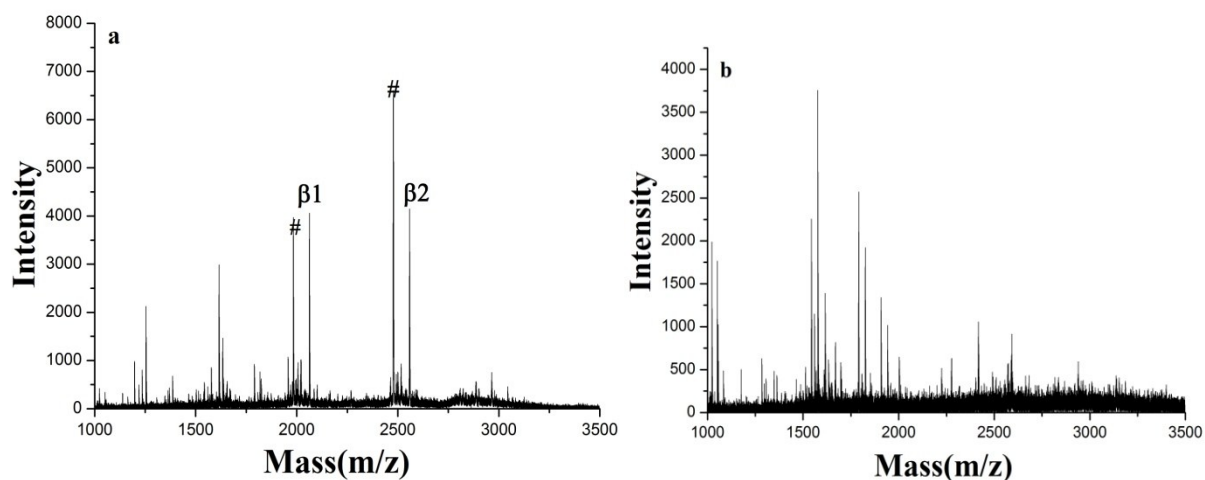

**Fig. S6.** MALDI-TOF mass spectra of tryptic digests from a peptide mixture of  $\beta$ -casein ( $4 \times 10^{-6}$ M) and BSA( $4 \times 10^{-6}$ M or  $4 \times 10^{-4}$ M): (a) direct analysis at a molar ratio of 1:1; after enriched by  $\text{TiO}_2$  at molar ratios of (b) 1:1, (c) 1:100. (# dephosphorylated fragment)

| NO. | Peptide sequence                      | Number<br>of phosphoryl<br>groups | Observed m/z |
|-----|---------------------------------------|-----------------------------------|--------------|
| β1  | FQ[pS]EEQQQTEDELQDK                   | 1                                 | 2061.72      |
| β2  | FQ[pS]EEQQQTEDELQDKIHPF               | 1                                 | 2556.09      |
| β3  | RELEELNVPGEIVE[pS]L[pS][pS][pS]EESITR | 4                                 | 3122.27      |

[pS]: phosphorylated site.

**Table S1 The detailed information for the detected phosphopeptides from tryptic digests of β -casein after enriched by GF-TiO<sub>2</sub>-GO in MALDI-TOF MS analysis**

| NO. | Peptide sequence    | Number<br>of phosphoryl<br>groups | Observed m/z |
|-----|---------------------|-----------------------------------|--------------|
| HS1 | D[pS]GEGDFLAEGGGV   | 1                                 | 1389.46      |
| HS2 | AD[pS]GEGDFLAEGGGV  | 1                                 | 1460.61      |
| HS3 | D[pS]GEGDFLAEGGGVR  | 1                                 | 1545.58      |
| HS4 | AD[pS]GEGDFLAEGGGVR | 1                                 | 1616.71      |

[pS]: phosphorylated site.

**Table S2 The detailed information for the detected phosphopeptides from human serum sample after enriched by GF-TiO<sub>2</sub>-GO in MALDI-TOF MS analysis**

| NO.  | Peptide sequence          | Number of phosphoryl groups | Observed m/z |
|------|---------------------------|-----------------------------|--------------|
| 1s   | TVDMESTE VF               | 1                           | 1237.6       |
| 2s   | TVDMMESTE VF              | 1                           | 1254.6       |
| 3m   | EQLSTSEENSKK              | 2                           | 1539.6       |
| 4s   | VPQLEIVPNSAEER            | 1                           | 1660.8       |
| 5 s  | DIGSESTEDQAMEDIK          | 1                           | 1847.0       |
| 6 m  | DIGSESTEDQAMEDIK          | 2                           | 1927.7       |
| 7s   | YKVPQLEIVPNSAEER          | 1                           | 1952.0       |
| 8 s  | FQSEEQQQTEDELQDK          | 1                           | 2061.7       |
| 9 m  | NVPGEIVESLSSEESITR        | 4                           | 2352.9       |
| 10 m | QMEAESISSSEEIVPNSVEAQK    | 5                           | 2704.4       |
| 11 m | QMEAESISSSEEIVPNSVEQK     | 5                           | 2720.4       |
| 12m  | QoMEAESISSSEEIVPNSVEQK    | 5                           | 2735.3       |
| 13 m | NTMEHVSSSEESIISQETYKQ     | 4                           | 2747.4       |
| 14s  | KIEKFQSEEQQQTEDELQDKIHPF  | 1                           | 2779.7       |
| 15m  | ELEELNVPGEIVESLSSEESITR   | 4                           | 2965.9       |
| 16s  | KIEK FQSEEQQQTEDELQDKIHPF | 1                           | 3054.1       |
| 17 m | RELEELNVPGEIVESLSSEESITR  | 4                           | 3122.3       |

s: single phosphopeptide; m: multiple phosphopeptide; o: oxidation on methionine

#: metastable losses of phosphoric acid

**Table S3 The detailed information of the observed phosphopeptides obtained from tryptic digests of non-fat milk.**
